# Supplementary material for: Solid-State 1 H Spin Polarimetry by 13 CH 3 Nuclear Magnetic Resonance
Source: Copernicus journal article supplement (doi:10.5194/mr-2021-25), 2021-03-15
Supplement: Supplementary file 1 [file mr-2021-25-supplement.pdf]

# Supplement

---

## Solid-State $^1\text{H}$ Nuclear Spin Polarimetry by $^{13}\text{CH}_3$ Nuclear Magnetic Resonance

---

Stuart J. Elliott<sup>a,b,†</sup>, Quentin Stern<sup>a</sup> and Sami Jannin<sup>a</sup>

<sup>a</sup> Centre de Résonance Magnétique Nucléaire à Très Hauts Champs - FRE 2034 Université de Lyon / CNRS / Université Claude Bernard Lyon 1 / ENS de Lyon, 5 Rue de la Doua, 69100 Villeurbanne, France

<sup>b</sup> Department of Chemistry, University of Liverpool, Liverpool L69 7ZD, United Kingdom

<sup>†</sup> [stuart-james.elliott@univ-lyon1.fr](mailto:stuart-james.elliott@univ-lyon1.fr)

## Contents

|   |                                                                  |   |
|---|------------------------------------------------------------------|---|
| 1 | $^{13}\text{C}$ NMR Spectra                                      | 3 |
| 2 | $^{13}\text{C}$ NMR Peak Asymmetry vs. $^1\text{H}$ Polarization | 4 |

## 1. $^{13}\text{C}$ NMR Spectra

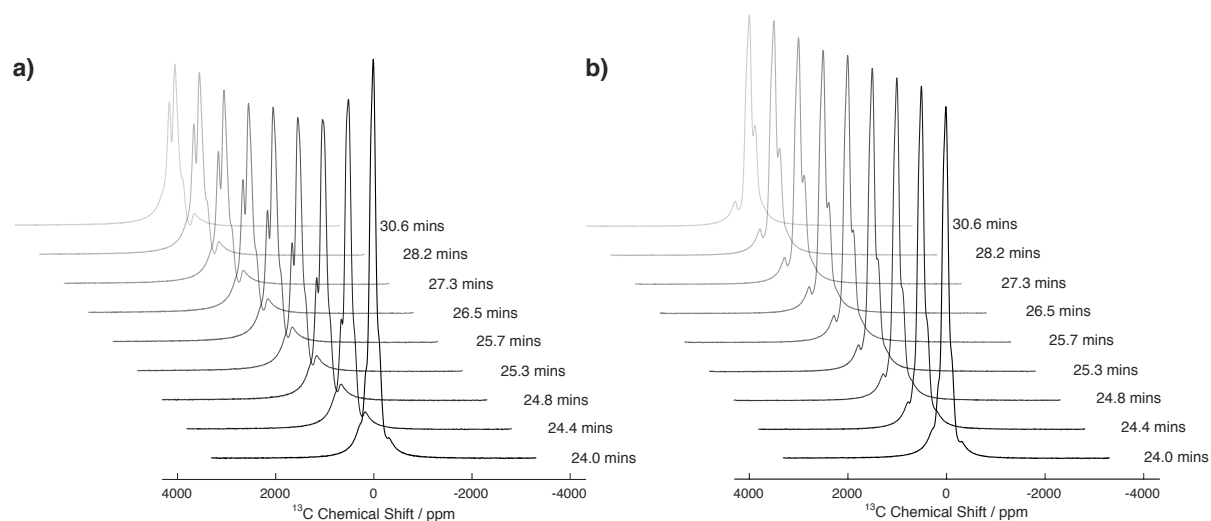

Figure S1: Relevant portions of the experimental  $^{13}\text{C}$  NMR spectra belonging to the  $^{13}\text{C}$ -labelled methyl ( $^{13}\text{CH}_3$ ) group of **I** acquired at 7.05 T ( $^1\text{H}$  nuclear Larmor frequency = 300.13 MHz,  $^{13}\text{C}$  nuclear Larmor frequency = 75.47 MHz) and 1.2 K with a single transient ( $rf$ -pulse flip angle =  $3.5^\circ$ ) as a function of  $^1\text{H}$  DNP time. (a) Positive microwave irradiation; and (b) Negative microwave irradiation. The labels indicate the  $^1\text{H}$  DNP time at which the spectra were recorded.

Figure S1 shows the relevant part of the experimental  $^{13}\text{C}$  NMR spectra of **I** acquired with a small flip angle  $rf$ -pulse ( $\beta = 3.5^\circ$ ) as a function of  $^1\text{H}$  DNP time. The  $^{13}\text{C}$  NMR spectra in Figure S1 were acquired by using the  $rf$ -pulse sequence shown in Figure 1 of the main text. The timings coincide with those shown in Figure 2 of the main text.

## 2. $^{13}\text{C}$ NMR Peak Asymmetry vs. $^1\text{H}$ Polarization

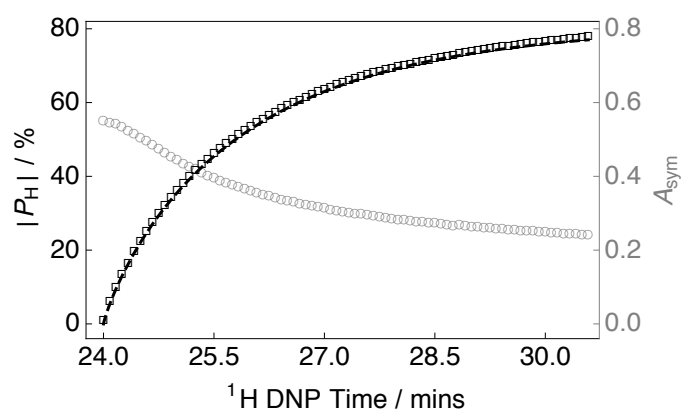

Figure S2: Experimental  $^1\text{H}$  polarization  $|P_H|$  DNP build-up curve (black filled squares) and  $^{13}\text{C}$  NMR peak asymmetry  $A_{\text{sym}}$  (grey empty circles) for **I** as a function of  $^1\text{H}$  DNP time acquired at 7.05 T ( $^1\text{H}$  nuclear Larmor frequency = 300.13 MHz,  $^{13}\text{C}$  nuclear Larmor frequency = 75.47 MHz) and 1.2 K with a single transient per data point for the case of negative microwave irradiation. The timings coincide with those shown in Figure 2 of the main text. The black solid line indicates the best fit of experimental data points for the  $^1\text{H}$  polarization  $|P_H|$  DNP build-up curve, and has the corresponding fitting function:  $A(1 - \exp\{-(t/\tau_{\text{DNP}})^\beta\})$ . Mean  $^1\text{H}$  DNP build-up time constant:  $\langle\tau_{\text{DNP}}\rangle = 122.0 \pm 0.4$  s.

Figure S2 shows the DNP build-up curve for the  $^1\text{H}$  polarization  $|P_H|$  of **I** as a function of  $^1\text{H}$  DNP time for negative microwave irradiation. Figure S2 also displays the  $^{13}\text{C}$  NMR peak asymmetry  $A_{\text{sym}}$  for sample **I** as a function of  $^1\text{H}$  DNP time.
